# Supplementary material
Source: PubMed Central journal article supplement (PMC6477681)
Supplement: NIHMS951242-supplement-1.pdf [file NIHMS951242-supplement-1.pdf]

**Figure S1. Propensity score distribution of patients treated with carvedilol and metoprolol**

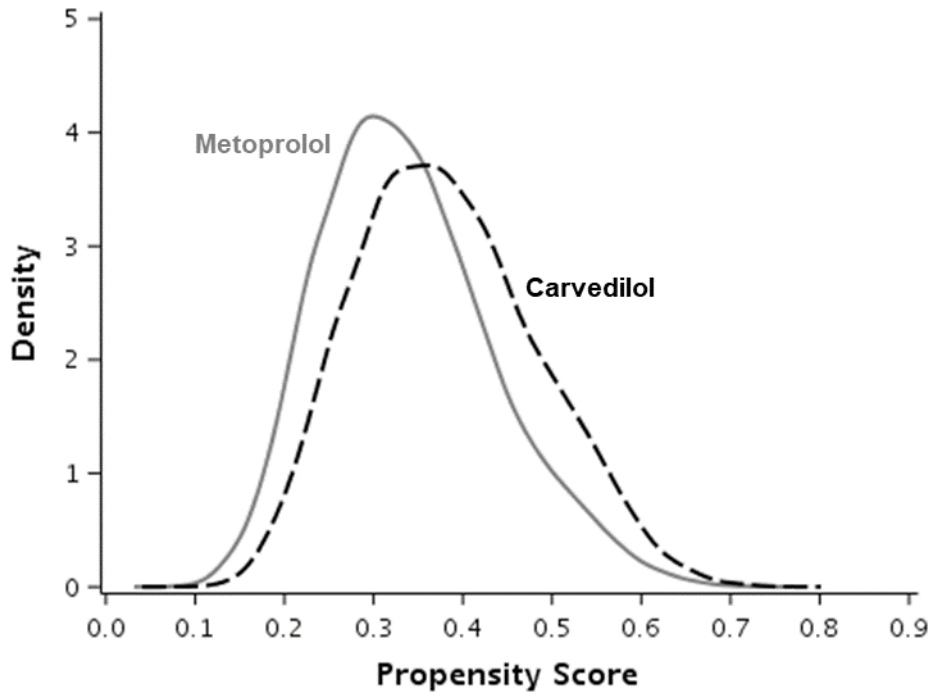

The black dashed line represents the propensity score distribution of carvedilol initiators. The gray solid line represents the propensity score distribution among metoprolol initiators.
