# Supplementary material
Source: PubMed Central journal article supplement (PMC6477681)
Supplement: NIHMS951242-supplement-6.pdf [file NIHMS951242-supplement-6.pdf]

**Table S4. Association between the initiation of carvedilol versus the initiation of the different metoprolol formulations and 1-year mortality: intent-to-treat analysis<sup>a</sup>**

| Carvedilol versus metoprolol tartrate (n = 21,294) |        |                                         |                    |                        |                                   |                                              |                    |                        |                                   |
|----------------------------------------------------|--------|-----------------------------------------|--------------------|------------------------|-----------------------------------|----------------------------------------------|--------------------|------------------------|-----------------------------------|
| Beta-blocker                                       | n      | 1-year all-cause mortality <sup>b</sup> |                    |                        |                                   | 1-year cardiovascular mortality <sup>c</sup> |                    |                        |                                   |
|                                                    |        | No. events (%)                          | Rate per 1,000 p-y | Unadjusted HR (95% CI) | Adjusted HR (95% CI) <sup>d</sup> | No. events (%)                               | Rate per 1,000 p-y | Unadjusted HR (95% CI) | Adjusted HR (95% CI) <sup>d</sup> |
| Metoprolol tartrate                                | 11,736 | 1,863 (15.9%)                           | 205.6              | 1.00 (ref.)            | 1.00 (ref.)                       | 797 (6.8%)                                   | 87.9               | 1.00 (ref.)            | 1.00 (ref.)                       |
| Carvedilol                                         | 9,558  | 1,625 (17.0%)                           | 225.1              | 1.09 (1.02, 1.17)      | 1.07 (0.99, 1.14)                 | 782 (8.2%)                                   | 108.3              | 1.23 (1.11, 1.36)      | 1.19 (1.08, 1.31)                 |

  

| Carvedilol versus metoprolol succinate (n = 15,328) |       |                                         |                    |                        |                                   |                                              |                    |                        |                                   |
|-----------------------------------------------------|-------|-----------------------------------------|--------------------|------------------------|-----------------------------------|----------------------------------------------|--------------------|------------------------|-----------------------------------|
| Beta-blocker                                        | n     | 1-year all-cause mortality <sup>b</sup> |                    |                        |                                   | 1-year cardiovascular mortality <sup>c</sup> |                    |                        |                                   |
|                                                     |       | No. events (%)                          | Rate per 1,000 p-y | Unadjusted HR (95% CI) | Adjusted HR (95% CI) <sup>d</sup> | No. events (%)                               | Rate per 1,000 p-y | Unadjusted HR (95% CI) | Adjusted HR (95% CI) <sup>d</sup> |
| Metoprolol succinate                                | 5,770 | 808 (14.0%)                             | 176.3              | 1.00 (ref.)            | 1.00 (ref.)                       | 364 (6.3%)                                   | 79.4               | 1.00 (ref.)            | 1.00 (ref.)                       |
| Carvedilol                                          | 9,558 | 1,625 (17.0%)                           | 225.1              | 1.27 (1.17, 1.39)      | 1.09 (1.00, 1.20)                 | 782 (8.2%)                                   | 108.3              | 1.35 (1.19, 1.52)      | 1.11 (0.99, 1.25)                 |

An intent-to-treat design was employed in all analyses.

<sup>a</sup> Patient counts, event counts (% of patients) and event rates presented are from the unweighted cohort.

<sup>b</sup> Cox proportional hazards models were used to estimate the associations between: 1) carvedilol versus metoprolol tartrate initiation and 1-year all-cause mortality; and 2) carvedilol versus metoprolol succinate initiation and 1-year all-cause mortality.

<sup>c</sup> Fine and Gray proportional subdistribution hazards models were used to estimate the associations between: 1) carvedilol versus metoprolol tartrate initiation and 1-year all-cause mortality; and 2) carvedilol versus metoprolol succinate initiation and 1-year all-cause mortality. Non-cardiovascular death was treated as a competing risk.

<sup>d</sup> Adjusted analyses controlled for baseline covariates listed in Table 1 using inverse probability of treatment weighting.

Abbreviations: CI, confidence interval; HR, hazard ratio; no., number; p-y, person-years; ref., referent
