# Supplementary material
Source: PubMed Central journal article supplement (PMC6477681)
Supplement: NIHMS951242-supplement-7.pdf [file NIHMS951242-supplement-7.pdf]

**Table S5. Association between carvedilol versus metoprolol initiation and 1-year mortality among individuals who did not have a cardiovascular hospitalization during the last 30 days of the baseline period: intent-to-treat analysis<sup>a</sup>**

| Patients who <i>did not</i> have a cardiovascular hospitalization during the last 30 days of the baseline period (n = 22,448) |        |                                         |                    |                        |                                   |                                              |                    |                        |                                   |
|-------------------------------------------------------------------------------------------------------------------------------|--------|-----------------------------------------|--------------------|------------------------|-----------------------------------|----------------------------------------------|--------------------|------------------------|-----------------------------------|
| Beta-blocker                                                                                                                  | n      | 1-year all-cause mortality <sup>b</sup> |                    |                        |                                   | 1-year cardiovascular mortality <sup>c</sup> |                    |                        |                                   |
|                                                                                                                               |        | No. events (%)                          | Rate per 1,000 p-y | Unadjusted HR (95% CI) | Adjusted HR (95% CI) <sup>d</sup> | No. events (%)                               | Rate per 1,000 p-y | Unadjusted HR (95% CI) | Adjusted HR (95% CI) <sup>d</sup> |
| Metoprolol                                                                                                                    | 14,691 | 2,035 (13.9%)                           | 176.1              | 1.00 (ref.)            | 1.00 (ref.)                       | 858 (5.8%)                                   | 74.2               | 1.00 (ref.)            | 1.00 (ref.)                       |
| Carvedilol                                                                                                                    | 7,757  | 1,209 (15.6%)                           | 204.5              | 1.16 (1.08, 1.25)      | 1.11 (1.03, 1.18)                 | 553 (7.1%)                                   | 93.5               | 1.25 (1.13, 1.39)      | 1.19 (1.07, 1.32)                 |

An intent-to-treat design was employed in all analyses.

<sup>a</sup> Patient counts, event counts (% of patients) and event rates presented are from the unweighted cohort.

<sup>b</sup> Cox proportional hazards models were used to estimate the associations between: 1) carvedilol versus metoprolol tartrate initiation and 1-year all-cause mortality; and 2) carvedilol versus metoprolol succinate initiation and 1-year all-cause mortality.

<sup>c</sup> Fine and Gray proportional subdistribution hazards models were used to estimate the associations between: 1) carvedilol versus metoprolol tartrate initiation and 1-year all-cause mortality; and 2) carvedilol versus metoprolol succinate initiation and 1-year all-cause mortality. Non-cardiovascular death was treated as a competing risk.

<sup>d</sup> Adjusted analyses controlled for baseline covariates listed in Table 1 using inverse probability of treatment weighting.

Abbreviations: CI, confidence interval; HR, hazard ratio; no., number; p-y, person-years; ref., referent
